# Supplementary material for: The hidden scabies: a rare case of atypical Norwegian scabies, case report and literature review
Source: Springer Nature journal article supplement (doi:10.1186/s13052-023-01547-z), 2024-01-17
Supplement: MOESM1 [file 26636382]

| Dates      |                                                                                                                                                                                                                                                                                                                                                                                                                                   | Relevant Past Medical History and Interventions      |                                                                                                                                                                                                                                                        |
|------------|-----------------------------------------------------------------------------------------------------------------------------------------------------------------------------------------------------------------------------------------------------------------------------------------------------------------------------------------------------------------------------------------------------------------------------------|------------------------------------------------------|--------------------------------------------------------------------------------------------------------------------------------------------------------------------------------------------------------------------------------------------------------|
|            | Down syndrome, formerly 36 weeks of gestational age, previous congenital heart disease. February 2023 rhinitis and intermittent fever with a positive test for Streptococcus Pyogenes oropharyngeal swab, therefore treated with oral antibiotic and antihistamine therapy. February 2023 treatment with 5% permethrin cream because her cohabiting sister was diagnosed with scabies, without post-treatment control evaluation. |                                                      |                                                                                                                                                                                                                                                        |
| Date       | Summaries from Initial and Follow-up Visits                                                                                                                                                                                                                                                                                                                                                                                       | Interventions                                        | Results                                                                                                                                                                                                                                                |
| April 2023 | Hospitalization to Fatebenefratelli's Paediatric Ward                                                                                                                                                                                                                                                                                                                                                                             | Blood tests<br>Allergological and ocular evaluations | Slightly increased ESR and serum amyloid A, positive ANA (1:160) and a reduction of LyB with a relatively higher level of LyT CD8 compared to LyT CD4.<br>Exclusion of any condition related to rheumatologic, topical allergies and signs of uveitis. |
| April 2023 | Dermatologic evaluation                                                                                                                                                                                                                                                                                                                                                                                                           | Light microscope                                     | Diagnosis of Norwegian scabies                                                                                                                                                                                                                         |
| April 2023 | Dermatologic evaluation                                                                                                                                                                                                                                                                                                                                                                                                           | Treatment                                            | Topical Benzil Benzoate 25% once a day for 3 days and then for another 3 days after a 5-day break. During the 5-day break topic Desoximetasone once a day for 5 days.                                                                                  |
| May 2023   | 1 month's dermatologic follow-up                                                                                                                                                                                                                                                                                                                                                                                                  | Dermatologic evaluation                              | Disease resolution                                                                                                                                                                                                                                     |
